# Supplementary material for: Mechanistic study of N–H- and H–N-codoping of a TiO2 photocatalyst for efficient degradation of benzene under visible light
Source: Royal Society of Chemistry journal article supplement (doi:10.1039/c9ra09661b), 2020-01-01
Supplement: c9ra09661b1.pdf [file c9ra09661b1.pdf]

## Mechanism study of N-H- and H-N-codoping TiO<sub>2</sub> photocatalyst for efficient degradation of benzene under visible light

Received 00th January 20xx,  
Accepted 00th January 20xx

DOI: 10.1039/x0xx00000x

www.rsc.org/

Minghui Li,<sup>a</sup> Wulin Song,<sup>ab†</sup> Lei Zeng,<sup>a</sup> Dawen Zeng,<sup>a</sup> Changsheng Xie<sup>a</sup> and Qun Yang<sup>c</sup>

To confirm the influence of annealing atmosphere orders on the photocatalytic activity of TiO<sub>2</sub>, we conduct the contrast test of N-H-TiO<sub>2</sub>-E and H-N-TiO<sub>2</sub>-E as presented in Fig .S1. N-H-TiO<sub>2</sub>-E was obtained by annealing in NH<sub>3</sub> for 2h and then held in H<sub>2</sub> for 4 h. Similarly, H-N-TiO<sub>2</sub>-E was obtained by treating in H<sub>2</sub> for 4h and NH<sub>3</sub> for 2h. The photocatalytic activity of N-H-TiO<sub>2</sub>-E behaves better than H-N-TiO<sub>2</sub>-E, which is accorded with the contrast between N-H-TiO<sub>2</sub> and H-N-TiO<sub>2</sub>. It proves that N doping followed by H doping is better for improving the performance of TiO<sub>2</sub>. In addition, the positive effect of H doping is also confirmed by the contrast of H-N-TiO<sub>2</sub> and H-N-TiO<sub>2</sub>-E, as well as N-H-TiO<sub>2</sub> and N-H-TiO<sub>2</sub>-E respectively, shown in Fig .S2. Because of the special disordered surface layer by H doping, the absorption ability is efficiently enhanced and the surface active sites are more produced, thus results in the higher mineralization rate of benzene.

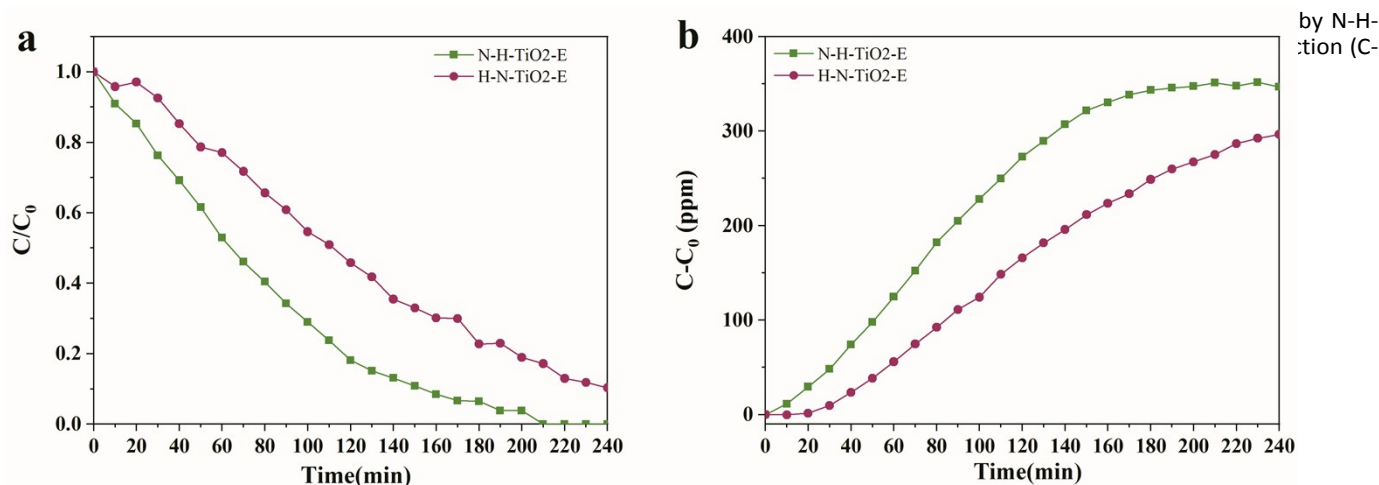

<sup>a</sup> State Key Laboratory of Materials Processing and Die & Mould Technology, Huazhong University of Science and Technology, P. R. China

<sup>b</sup> Analytical and testing center, Huazhong University of Science and Technology, P. R. China

<sup>c</sup> Wuhan Maritime Communication Research Institute, P. R. China

† Corresponding author at: State Key Lab of Materials Processing and Die&Mould Technology, Huazhong University of Science and Technology, Wuhan, 430074, P. R. China. Tel/fax:+86 027 87792025

Email: wulins@126.com

Electronic Supplementary Information (ESI) available: [details of any supplementary information available should be included here]. See DOI: 10.1039/x0xx00000x

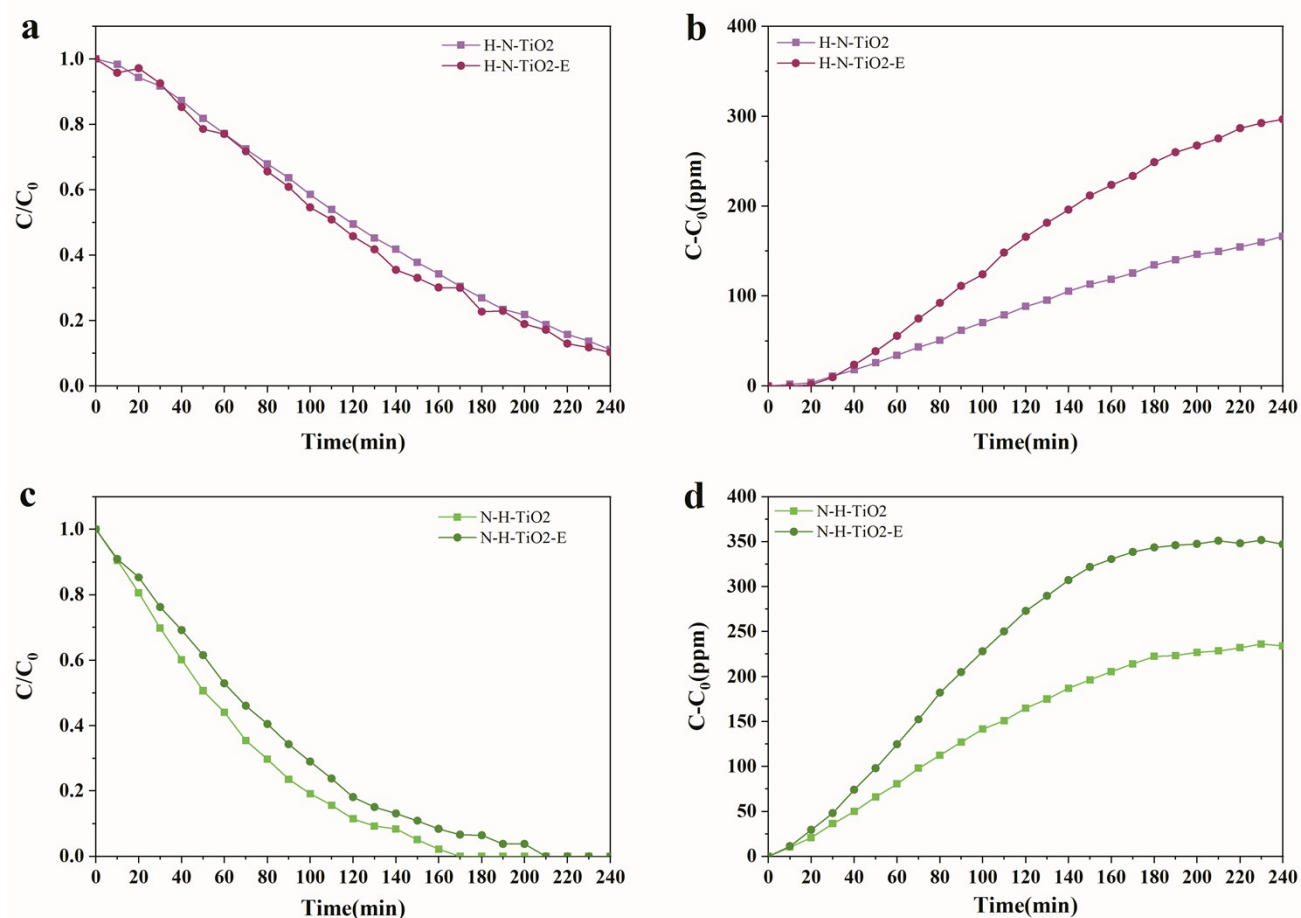

Fig. S2. (a, b) the contrast tests of the photocatalytic activity between H-N-TiO<sub>2</sub> and H-N-TiO<sub>2</sub>-E under visible light; (c, d) the contrast tests of the photocatalytic activity between N-H-TiO<sub>2</sub> and N-H-TiO<sub>2</sub>-E under visible light.
